# Supplementary material
Source: HighWire-hosted journal article supplement (https://cmaj.ca/highwire/filestream/58548/field_highwire_adjunct_files/0/high-gronich-1-at.pdf)
Supplement: high-gronich-1-at.pdf [file high-gronich-1-at.pdf]

Appendix 1 (as submitted by authors): Multivariable analysis of venous (A) and arterial (B) thrombotic risk in drospirenone-containing combined oral contraceptive (COC) users compared with second-generation COC users. Rate ratio (RR) above 1.0 indicates increased risk. Second-generation COC users: *n* (number of thrombotic events) venous = 23, arterial = 41; *N* (woman-years of follow-up) venous = 33 187, arterial = 33 219; drospirenone-containing COC users: *n* (venous) = 99, *n* (arterial) = 66; *N* (venous) = 114 797, *N* (arterial) = 114 755. CI = confidence interval.

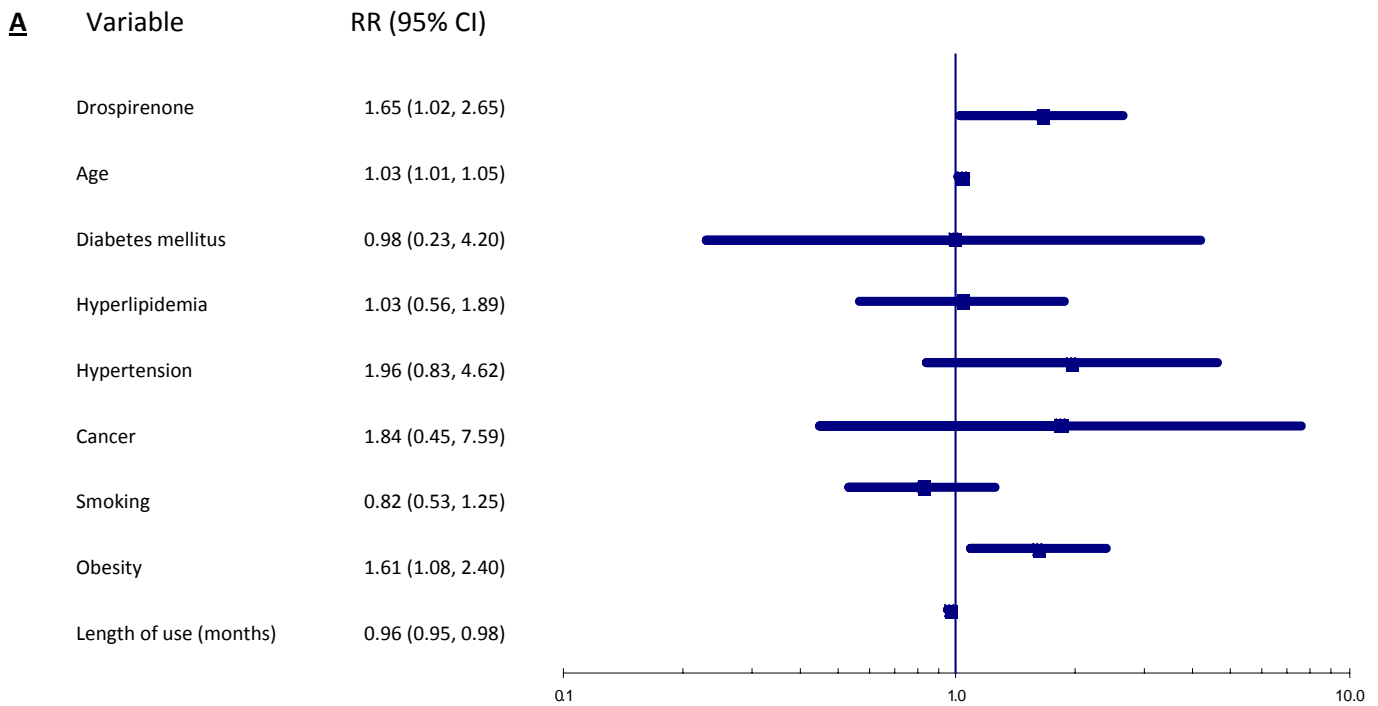

Appendix to Gronich N, Lavi I, Rennert G. Higher risk of venous thrombosis associated with drospirenone-containing oral contraceptives: a population-based cohort study. *CMAJ* 2011. DOI 10.1503/cmaj.110463.  
Copyright © 2011 Canadian Medical Association or its licensors.

| <b>B</b> | Variable               | RR (95% CI)       |
|----------|------------------------|-------------------|
|          | Drospirenone           | 0.87 (0.56, 1.33) |
|          | Age                    | 1.07 (1.05, 1.10) |
|          | Diabetes mellitus      | 1.30 (0.45, 3.75) |
|          | Hyperlipidemia         | 1.04 (0.55, 1.99) |
|          | Hypertension           | 2.05 (1.02, 4.12) |
|          | Cancer                 | 1.64 (0.40, 6.78) |
|          | Smoking                | 1.08 (0.69, 1.69) |
|          | Obesity                | 1.55 (0.97, 2.48) |
|          | Length of use (months) | 0.97 (0.96, 0.99) |

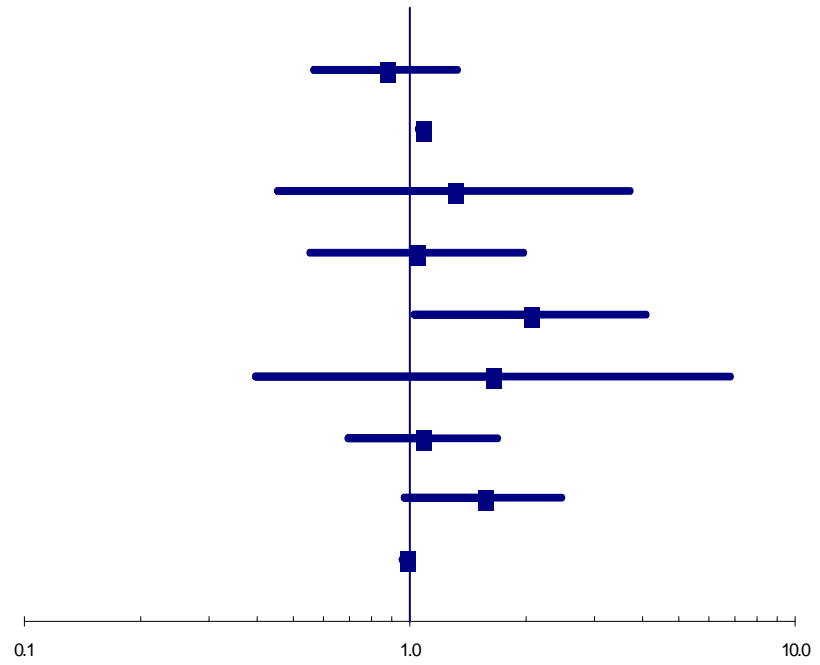

Appendix to Gronich N, Lavi I, Rennert G. Higher risk of venous thrombosis associated with drospirenone-containing oral contraceptives: a population-based cohort study. *CMAJ* 2011. DOI 10.1503/cmaj.110463.  
 Copyright © 2011 Canadian Medical Association or its licensors.
